# Supplementary material for: The architecture of abnormal reward behaviour in dementia: multimodal hedonic phenotypes and brain substrate
Source: PubMed Central journal article supplement (PMC10023829; doi:10.1093/braincomms/fcad027), 2023-02-09
Supplement: fcad027_supplementary_data.pdf [file fcad027_supplementary_data.pdf]

## *SUPPLEMENTARY MATERIAL*

### **The architecture of abnormal reward processing in dementia: multimodal hedonic phenotypes and brain substrate, by A Chokesuwattanaskul et al**

#### **Multiple correspondence analysis: background and rationale**

Multiple correspondence analysis (MCA) is a type of exploratory factor analysis specifically designed for categorical datasets, analogous to principal component analysis on continuous datasets. One distinct advantage of MCA is that it does not assume any particular distribution of the data. MCA projects the data onto a lower dimensional space that maximally retains the information of the initial data, and allows simultaneous examination of all potentially relevant variables (a further advantage over conventional pair-wise associations). Because MCA is conducted at the level of response categories rather than variables, it allows the relationship between each response category and variable to be characterised. For example, if there are three types of responses (increased, decreased, no change) for a particular reward behaviour, MCA will generate three variables to represent these response categories, represented in an 'indicator matrix', where each row corresponds to a participant and each column represents a response category.

After the indicator matrix is derived, it is transformed into a probability matrix where each element is divided by the grand sum of the matrix, hence the name. The final step is to apply singular vector decomposition on the "standardised" probability matrix, to generate the eigenvectors of rows and columns and a matrix of eigenvalues. Intuitively, eigenvectors of this standardised probability represent the explained variance (information) in different, orthogonal dimensions. We reduce the dimension to match the desired number of factors: the eigenvectors and eigenvalues, standardised by the magnitude of the sum of the row and column values in the probability matrix, are used to generate row and column factor scores.

Each factor acts as a 'latent variable' that explains a portion of the variance in the data. The first factor accounts for the largest portion of explained variance; each subsequent factor is orthogonal to the former factors and describes a portion of the remaining variance. In general, the 'elbow' on the scree plot of explained variance is used to determine the number of factors to retain. Additionally, it is recommended that all retained factors together explain > 70% of the total variance ('inertia'). Here, the principal factors 1 and 2 are column factors: they represent a portion of variance in the column dimension of the data. The correlation (squared cosine) of a feature on a particular factor quantifies the strength of association

between them - a measure of the quality of representation of the feature by that factor, or how well the feature (presence vs. absence) is discriminated by the factor. Higher squared cosine values correspond to greater discriminatory power. The sum of squared cosine values across all retained factors denotes how well each feature is represented by the retained factors (normalised between 0 and 1, a value closer to 1 signifying that the feature is well represented).

Another useful property of MCA is that it allows additional data not included explicitly in the original analysis to be mapped as "supplementary data" onto the same dimensions as the original model. In other words, MCA allows us to map new data points, whether a new observation or a new feature (here, diagnostic groups), into the common, derived factor space. We can derive the factor values for the supplementary feature by exploiting the information derived from singular vector decomposition. If the original features are represented in the matrix  $f(\text{COL}) \times f(\text{ROW})$ , a supplementary feature,  $c_1$ , is mapped into the column factor space as:  $f(\text{COL} + c_1) \times f(\text{ROW})$ ; the additional information will be  $f(c_1) \times f(\text{ROW})$ . Such supplementary features do not affect the factor analysis of the original data, however, this process allows them to be assessed (and visualised) in a common space with the original features.

### **Cluster stability analysis: background**

Cluster stability analysis<sup>1</sup> is a form of sensitivity analysis used for evaluating the performance of clustering algorithms. Here, we employed a bootstrapping technique that subsamples a designated proportion (here, 80%) of data from the whole dataset, with replacement after each iteration. The k-means clustering algorithm was applied on all subsampled data. In each iteration, the similarity of the clustering result on the subsample with the entire original dataset was determined by calculating the mean percentage of participants in each cluster who belonged to the same cluster in the original analysis, across all clusters (see Supplementary Figure 3). A similarity of 100% would signify all participants in each cluster in the subsample were included in the same clusters in the original analysis on the entire dataset. A cluster stability index was derived by averaging the percentage similarity of every subsample over the assigned number of iterations.

### **Brain imaging acquisition and pre-processing**

For each patient, a sagittal 3D magnetization-prepared rapid-gradient echo T1-weighted volumetric brain MRI sequence (TE/TR/TI 2.9/2200/900ms, dimensions  $256 \times 256 \times 208$ , voxel volume of  $1.1 \times 1.1 \times 1.1\text{mm}$ ) was acquired on a Siemens Prisma 3T MRI scanner using a 32-channel phased-array head-coil and pre-processed using standard procedures in SPM12 ([www.fil.ion.ucl.ac.uk/spm](http://www.fil.ion.ucl.ac.uk/spm), details in

Supplementary material). Ninety-six volumetric brain MRI scans from the patient cohort (22 bvFTD, 23 AD, 20 nvPPA, 20 svPPA, 11 lvPPA) were included in the VBM analysis. Twenty-three patients were excluded either because their scan was unavailable or of inadequate quality. Pre-processing of brain images was performed using the New Segment and Diffeomorphic Anatomical Registration Through Exponentiated Lie Algebra (DARTEL) toolboxes on SPM12, following an optimised protocol. Normalisation, segmentation, and modulation of grey and white matter images were performed using default parameter settings. Grey matter images were smoothed using a 6 mm full-width-at-half-maximum Gaussian kernel. A study-specific template brain image was created by warping all bias-corrected native space brain images to the final DARTEL template and calculating the average of the warped brain images. Total intracranial volume for each participant was calculated by summing grey matter, white matter and cerebrospinal fluid volumes.

**Supplementary Table 1. Neuropsychological and general behavioural characteristics of participant groups**

| Cognitive domain                  | Controls                         | AD                                       | lvPPA                                      | bvFTD                                   | svPPA                                      | nfvPPA                                    |
|-----------------------------------|----------------------------------|------------------------------------------|--------------------------------------------|-----------------------------------------|--------------------------------------------|-------------------------------------------|
|                                   | n = 42                           | n = 34                                   | n = 12                                     | n = 27                                  | n = 22                                     | n = 24                                    |
| <b>General</b>                    |                                  |                                          |                                            |                                         |                                            |                                           |
| WASI VIQ                          | 125.5 (120.2-129.8) <sup>d</sup> | <b>97.0 (84.0-110.5)<sup>2,4,e</sup></b> | <b>55.0 (55.0-70.0)<sup>1,a</sup></b>      | <b>76.0 (55.0-113.0)<sup>b</sup></b>    | <b>65.0 (55.0-78.8)<sup>1,b</sup></b>      | <b>74.0 (66.0-90.5)<sup>c</sup></b>       |
| WASI PIQ                          | 121.0 (113.0-128.8) <sup>d</sup> | <b>83.0 (74.0-96.2)<sup>4,e</sup></b>    | <b>85.0 (74.0-94.5)<sup>4,a</sup></b>      | <b>94.0 (77.0-109.0)<sup>4,b</sup></b>  | 116.0<br>(96.8-129.5) <sup>1,2,3,5,b</sup> | <b>89.0 (77.0-106.0)<sup>4,c</sup></b>    |
| <b>Episodic memory</b>            |                                  |                                          |                                            |                                         |                                            |                                           |
| RMT Faces (/50)                   | 44.0 (41.0-48.0) <sup>b</sup>    | <b>30.5 (26.0-35.2)<sup>m</sup></b>      | <b>29.0 (25.0-32.5)<sup>a</sup></b>        | <b>30.5 (25.0-37.0)<sup>a</sup></b>     | <b>30.0 (28.0-36.5)<sup>d</sup></b>        | <b>34.0 (30.0-39.0)<sup>c</sup></b>       |
| RMT Words (/50)                   | 49.0 (47.8-50.0) <sup>b</sup>    | <b>28.5 (25.0-38.2)<sup>m</sup></b>      | <b>25.0 (25.0-38.0)<sup>a</sup></b>        | <b>36.0 (28.8-44.2)<sup>c</sup></b>     | <b>33.0 (28.5-39.0)<sup>f</sup></b>        | <b>41.0 (28.0-46.0)<sup>c</sup></b>       |
| <b>Executive</b>                  |                                  |                                          |                                            |                                         |                                            |                                           |
| DS forward (max 12)               | 7.0 (6.0-8.0) <sup>b</sup>       | 6.0 (5.0-7.0) <sup>2,5,e</sup>           | <b>3.0 (1.0-4.0)<sup>1,3,4,a</sup></b>     | 6.0 (5.0-7.8) <sup>2,5,a</sup>          | <b>7.0 (6.0-7.2)<sup>2,5,b</sup></b>       | <b>4.0 (4.0-5.0)<sup>1,3,4,c</sup></b>    |
| DS reverse (max 12)               | 5.0 (4.0-6.0) <sup>b</sup>       | <b>4.0 (3.0-4.5)<sup>2,4,5,f</sup></b>   | <b>2.0 (0-3.0)<sup>1,3,4,a</sup></b>       | <b>4.0 (3.0-5.0)<sup>2,5,a</sup></b>    | 5.0 (4.0-5.0) <sup>1,2,5,b</sup>           | <b>3.0 (0-3.0)<sup>1,3,4,c</sup></b>      |
| DKEFS Stroop: colour (90 sec)     | 30.0 (27.0-35.0) <sup>c</sup>    | <b>54.0 (45.0-61.0)<sup>2,5,h</sup></b>  | 90.0 (78.5-90.0) <sup>1,3,4,a</sup>        | <b>49.0 (36.0-74.0)<sup>2,5,b</sup></b> | <b>53.0 (39.0-71.5)<sup>2,5,b</sup></b>    | <b>90.0 (63.0-90.0)<sup>1,3,4,g</sup></b> |
| words (90 sec)                    | 22.0 (20.0-25.0) <sup>c</sup>    | <b>32.0 (28.0-36.0)<sup>5,h</sup></b>    | <b>47.0 (41.0-55.0)<sup>3,4,a</sup></b>    | <b>30.0 (23.0-36.0)<sup>2,5,b</sup></b> | 28.0 (23.0-38.2) <sup>2,5,b</sup>          | <b>66.0 (52.0-90.0)<sup>1,3,4,g</sup></b> |
| interference (180 sec)            | 54.0 (45.5-67.0) <sup>c</sup>    | <b>148.0 (106.0-180.0)<sup>h</sup></b>   | <b>180.0 (180.0-180.0)<sup>3,4,a</sup></b> | <b>92.0 (57.0-180.0)<sup>2,b</sup></b>  | <b>92.5 (61.2-131.2)<sup>2,5,b</sup></b>   | <b>180.0 (119.0-180.0)<sup>4,g</sup></b>  |
| TMT-A (sec)                       | 29.5 (23.8-36.2) <sup>b</sup>    | <b>69.0 (58.0-127.0)<sup>4,f</sup></b>   | <b>106.0 (58.5-141.5)<sup>4,a</sup></b>    | <b>56.0 (40.0-149.0)<sup>b</sup></b>    | <b>48.5 (33.0-61.8)<sup>1,2,b</sup></b>    | <b>62.0 (44.0-143.0)<sup>g</sup></b>      |
| TMT-B (sec)                       | 58.0 (47.0-83.2) <sup>b</sup>    | <b>300.0 (194.5-300.0)<sup>4,f</sup></b> | <b>300.0 (300.0-300.0)<sup>4,b</sup></b>   | <b>200.0 (100.0-300.0)<sup>b</sup></b>  | <b>105.0 (82.8-156.5)<sup>1,2,b</sup></b>  | <b>238.0 (150.0-300.0)<sup>g</sup></b>    |
| Letter fluency (F)                | 18.0 (15.0-20.2) <sup>b</sup>    | <b>10.0 (6.0-13.0)<sup>2,f</sup></b>     | <b>2.0 (0-4.5)<sup>1,a</sup></b>           | <b>6.0 (2.0-12.0)<sup>b</sup></b>       | <b>6.5 (0.8-12.2)<sup>b</sup></b>          | <b>3.0 (0-8.2)<sup>h</sup></b>            |
| Category fluency (animals)        | 24.0 (21.0-28.0) <sup>b</sup>    | <b>9.0 (5.8-13.2)<sup>e</sup></b>        | <b>3.0 (1.0-6.5)<sup>a</sup></b>           | <b>9.0 (4.0-17.0)<sup>b</sup></b>       | <b>4.5 (1.8-9.5)<sup>b</sup></b>           | <b>8.5 (1.5-14.5)<sup>h</sup></b>         |
| <b>Language</b>                   |                                  |                                          |                                            |                                         |                                            |                                           |
| BPVS (/150)                       | 148.0 (148.0-149.0) <sup>d</sup> | <b>144.0 (124.8-146.2)<sup>4,e</sup></b> | <b>132.0 (79.5-145.0)<sup>a</sup></b>      | <b>140.0 (101.0-148.0)<sup>b</sup></b>  | <b>56.5 (19.5-105.5)<sup>1,3,5,b</sup></b> | <b>139.5 (114.8-144.0)<sup>4,b</sup></b>  |
| GNT (/30)                         | 26.0 (23.8-28.0) <sup>b</sup>    | <b>14 (4.5-20.5)<sup>4,f</sup></b>       | <b>7.5 (0-17.8)<sup>4,b</sup></b>          | <b>14.0 (2.2-23.8)<sup>a</sup></b>      | <b>0 (0-0)<sup>1,3,5,b</sup></b>           | <b>9.0 (5.0-19.0)<sup>4,c</sup></b>       |
| <b>Other skills</b>               |                                  |                                          |                                            |                                         |                                            |                                           |
| GDA (/24)                         | 14.0 (11.8-19.0) <sup>b</sup>    | <b>2.0 (1.0-6.5)<sup>4,f</sup></b>       | <b>0 (0-0.5)<sup>3,4,a</sup></b>           | <b>6.0 (3.5-13.0)<sup>2,d</sup></b>     | 12.5 (3.5-17.0) <sup>1,2,5,b</sup>         | <b>3.0 (0-5.0)<sup>4,c</sup></b>          |
| VOSP (/20)                        | 19.0 (18.0-20.0) <sup>b</sup>    | <b>16.0 (14.0-17.2)<sup>e</sup></b>      | <b>15.0 (14.0-16.5)<sup>a</sup></b>        | <b>15.5 (10.0-18.0)<sup>c</sup></b>     | <b>16.0 (15.0-17.5)<sup>c</sup></b>        | <b>16.5 (14.0-17.2)<sup>d</sup></b>       |
| <b>General behavioural change</b> |                                  |                                          |                                            |                                         |                                            |                                           |
| Disinhibition                     | 1 (2)                            | <b>8 (24)<sup>3,4</sup></b>              | 2 (17) <sup>3,4</sup>                      | <b>24 (89)<sup>1,2,5</sup></b>          | <b>15 (68)<sup>1,2,5</sup></b>             | <b>7 (29)<sup>3,4</sup></b>               |
| Apathy                            | 2 (5)                            | <b>23 (68)</b>                           | <b>5 (42)<sup>3</sup></b>                  | <b>23 (85)<sup>2,4,5</sup></b>          | <b>10 (45)<sup>3</sup></b>                 | <b>12 (50)<sup>3</sup></b>                |
| Obsessionality                    | 1 (2)                            | <b>8 (24)<sup>3,4</sup></b>              | 3 (25) <sup>3</sup>                        | <b>21 (78)<sup>1,2,5</sup></b>          | <b>14 (64)<sup>1</sup></b>                 | <b>8 (33)<sup>3</sup></b>                 |
| Loss of empathy                   | 0                                | <b>6 (18)<sup>3,4,5</sup></b>            | <b>6 (50)</b>                              | <b>23 (85)<sup>1</sup></b>              | <b>14 (64)<sup>1</sup></b>                 | <b>14 (58)<sup>1</sup></b>                |
| Inappropriate humour              | 4 (10)                           | 3 (9) <sup>2,3,4,5</sup>                 | <b>5 (42)<sup>1,4</sup></b>                | <b>21 (78)<sup>1</sup></b>              | <b>19 (86)<sup>1,2</sup></b>               | <b>17 (71)<sup>1</sup></b>                |

Counts (percentage of group) are shown for behavioural change data; and mean (standard deviation) or median (interquartile range) scores are shown for neuropsychological tests (with maximum scores in parentheses). Differences between diagnostic groups were assessed using ANOVA, Kruskal-Wallis test and chi-square test with post-hoc correction. Significant differences between patient groups and healthy controls are in bold; significant differences between patient groups are coded as follows: <sup>1</sup>significantly different from AD, <sup>2</sup>significantly different from lvPPA, <sup>3</sup>significantly different from bvFTD, <sup>4</sup>significantly different from svPPA, <sup>5</sup>significantly different from nfvPPA (all  $p_{FDR} < 0.05$ ). AD, patient group with typical Alzheimer's disease; BPVS, British Picture Vocabulary Scale (Dunn, Dunn and Whetton, 1982); bvFTD, patient group with behavioural variant frontotemporal dementia; Controls, healthy control group ; D-KEFS, Delis Kaplan Executive System (Delis et al., 2001); DS, Digit Span; GDA, Graded Difficulty Arithmetic test (Jackson and Warrington, 1986); GNT, Graded Naming Test (McKenna and Warrington, 1983); lvPPA, patient group with

logopenic variant primary progressive aphasia; nfvPPA, patient group with nonfluent/agrammatic variant primary progressive aphasia; PIQ, performance IQ; RMT, Recognition Memory Test (Warrington, 1984); svPPA, patient group with semantic variant primary progressive aphasia; TMT, trail making test; VIQ, verbal IQ; VOSP, Visual Object and Space Perception Battery – Object Decision test (Warrington, McKenna and Orpwood, 1998); WASI, Wechsler Abbreviated Scale of Intelligence (Wechsler, 1997). A reduced number of participants completed certain tests, as follows: <sup>a</sup>n-1, <sup>b</sup>n-2, <sup>c</sup>n-3, <sup>d</sup>n-4, <sup>e</sup>n-5, <sup>f</sup>n-6, <sup>g</sup>n-7, <sup>h</sup>n-8, <sup>m</sup>n-13.

**Supplementary Table 2. Symptom survey used to record changes in reward behaviour**

| <b>Reward domain</b> | <b>Questions</b>                                                                                                                              | <b>Coding</b>         |
|----------------------|-----------------------------------------------------------------------------------------------------------------------------------------------|-----------------------|
|                      | <i>For each question, please say whether [your / his / her] liking, enjoyment and/or interest has changed, now compared with 10 years ago</i> |                       |
| <b>Primary</b>       |                                                                                                                                               |                       |
| Appetite             | Has there been a change in appetite/ portion size consumed at meals?<br>If yes, is this increased or decreased?<br>Comment:                   | Yes / No<br>Inc / Dec |
| Sweet tooth          | Has there been any increased liking for sweet foods?<br>Comment:                                                                              | Yes / No              |
| Sexual behaviour     | Has there been any change in sexual interest or activity?<br>If yes, is this increased or decreased?<br>Comment:                              | Yes / No<br>Inc / Dec |
| <b>Non-primary</b>   |                                                                                                                                               |                       |
| Music                | Has there been any change in interest or feelings in response to music?<br>If yes, is this increased or decreased?<br>Comment:                | Yes / No<br>Inc / Dec |
| Religion             | Has there been any increased religious interest or feelings?<br>Comment:                                                                      | Yes / No              |
| Art                  | Has there been any change in interest in viewing or producing visual art?<br>If yes, is this increased or decreased?<br>Comment:              | Yes / No<br>Inc / Dec |
| Colours              | Has there been any increased preference or appreciation for particular colours?<br>Comment:                                                   | Yes / No              |

Respondents were patients' primary caregivers or healthy control participants. Prior to completing the survey, caregivers were instructed that a relevant behavioural 'change' in a particular reward domain might comprise an evident alteration in liking, enjoyment and/or interest (e.g., seeking or avoidance of the relevant item) that the caregiver had observed in the person with dementia.

**Supplementary Table 3. Caregiver comments extracted from the reward behavioural symptom survey**

| Reported behavioural change           | Syndrome | Representative comments                                                                                                                                  |
|---------------------------------------|----------|----------------------------------------------------------------------------------------------------------------------------------------------------------|
| <i>Primary rewards</i>                |          |                                                                                                                                                          |
| Altered appetite                      | bvFTD    | Always wants to eat toast and peanut butter                                                                                                              |
|                                       | svPPA    | Always wants to eat tomato ketchup                                                                                                                       |
| Increased liking for sweet foods      | AD       | Likes chocolate, sweets, ice cream                                                                                                                       |
|                                       | bvFTD    | Always eats sweet foods, biscuits, cakes, grapes                                                                                                         |
|                                       | svPPA    | Likes sweets, scones, tomato ketchup                                                                                                                     |
|                                       | nfvPPA   | Likes sweets, jams, tarts, chocolate                                                                                                                     |
| Increased sexual interest or activity | bvFTD    | Increased libido, more sexual feelings, more interested in pornography and masturbation                                                                  |
|                                       | svPPA    | Increased libido, more physical (cuddling), overly affectionate                                                                                          |
| Decreased sexual interest or activity | AD       | Does not initiate sexual activity, less libido                                                                                                           |
|                                       | lvPPA    | Decreased libido                                                                                                                                         |
|                                       | bvFTD    | Decreased libido, no sexual behaviour at all, no interest at all                                                                                         |
|                                       | svPPA    | Decreased libido                                                                                                                                         |
| <i>Non-primary rewards</i>            |          |                                                                                                                                                          |
| Increased responsiveness to music     | bvFTD    | Listen to music more<br>Loves music and dancing<br>Really like certain songs                                                                             |
|                                       | svPPA    | Likes older music more<br>Listens to music compulsively, gets very emotional<br>Likes music more<br>Likes listening to the same few things               |
|                                       | nfvPPA   | Listens repetitively to same music                                                                                                                       |
| Decreased responsiveness to music     | bvFTD    | Now averse to music                                                                                                                                      |
|                                       | svPPA    | Less interested in music                                                                                                                                 |
| Increased religiosity                 | lvPPA    | Starts going to church after stopped going 20 years previously                                                                                           |
|                                       | bvFTD    | Obsessed with saying grace before meals<br>Prays more regularly, more connected with God<br>Discusses religious topics more                              |
|                                       | svPPA    | Prays more, feels more 'in touch' with God<br>More committed to church<br>Now believes in afterlife<br>Speaks more about God<br>Now likes attending mass |
|                                       | nfvPPA   | Now watches religious TV programs                                                                                                                        |
| Increased interest in art             | lvPPA    | More into painting                                                                                                                                       |
|                                       | bvFTD    | Recently got paid for work with a painting<br>Likes colouring book                                                                                       |
| Decreased interest in art             | lvPPA    | Studied history of art but less bothered now                                                                                                             |
|                                       | svPPA    | No interest now though used to work at an art school                                                                                                     |

|                                           |        |                                                                                                                                   |
|-------------------------------------------|--------|-----------------------------------------------------------------------------------------------------------------------------------|
|                                           | nfvPPA | Doesn't like galleries anymore                                                                                                    |
| Increased liking for particular colour(s) | AD     | Likes green                                                                                                                       |
|                                           | lvPPA  | Prefer bright colours<br>Likes orange                                                                                             |
|                                           | bvFTD  | Loves bright colours<br>Likes pastel colours<br>Loves black and orange; loves green and orange                                    |
|                                           | svPPA  | Always dresses in black<br>Dresses in one colour – red, purple, green<br>Loves red and black, hates green<br>Loves bright colours |
|                                           | nfvPPA | Likes black more<br>Paints with more pastel colours                                                                               |

Representative comments from primary caregivers completing the symptom survey about patients' reward behaviours are presented here. AD, patients with typical Alzheimer's disease; bvFTD, patients with behavioural variant frontotemporal dementia; lvPPA, patients with logopenic aphasia; nfvPPA, patients with progressive non-fluent aphasia; svPPA, patients with semantic dementia.



**Supplementary Table 4. Correlations of reward features with principal factors**

| Reward features        | Factor score |          | Squared cosine |          | Sum of squared cosines |
|------------------------|--------------|----------|----------------|----------|------------------------|
|                        | Factor 1     | Factor 2 | Factor 1       | Factor 2 |                        |
| Appetite (Dec)         | -0.26        | -0.02    | 0.87           | 0.004    | 0.872                  |
| Appetite (Inc)         | -0.37        | 0.00     | 0.91           | 0.000    | 0.909                  |
| Sweet tooth (Inc)      | -0.31        | -0.01    | 0.95           | 0.000    | 0.950                  |
| Sexual behaviour (Dec) | -0.54        | -0.17    | 0.90           | 0.095    | 0.997                  |
| Sexual behaviour (Inc) | -0.66        | 0.42     | 0.69           | 0.281    | 0.972                  |
| Music (Dec)            | -0.46        | -0.31    | 0.67           | 0.296    | 0.965                  |
| Music (Inc)            | -0.38        | 0.22     | 0.76           | 0.24     | 0.999                  |
| Art (Dec)              | -0.53        | -0.11    | 0.95           | 0.041    | 0.995                  |
| Art (Inc)              | -0.37        | -0.02    | 0.83           | 0.003    | 0.833                  |
| Colour (Inc)           | -0.32        | -0.23    | 0.64           | 0.326    | 0.970                  |
| Religion (Inc)         | -0.47        | 0.29     | 0.70           | 0.269    | 0.971                  |
| <b>Clusters</b>        |              |          |                |          |                        |
| ‘Reward-seeking’       | -0.37        | 0.180    |                |          |                        |
| ‘Reward-restricted’    | -0.32        | -0.180   |                |          |                        |
| ‘Eating-predominant’   | -0.08        | 0.001    |                |          |                        |
| ‘Control-like’         | 0.20         | 0.004    |                |          |                        |

This table displays the squared cosine value for each reward feature with the two principal factors (factor 1 and factor 2) identified from the multiple correspondence analysis. The sum of the squared cosines from factor 1 and factor 2 for each feature is shown in the column ‘Sum’. Features with a high sum of squared cosine values (sum close to 1) are well-represented by the two principal factors. Dec, decreased; Inc, increased.

**Supplementary Table 5. Associations of principal reward factors with general disease characteristics and socio-emotional behaviours**

| Characteristic                     | Factor 1 score                |                           |         | Factor 2 score            |                           |         |
|------------------------------------|-------------------------------|---------------------------|---------|---------------------------|---------------------------|---------|
|                                    | Spearman's rho                |                           | p-value | Spearman's rho            |                           | p-value |
| General disease                    |                               |                           |         |                           |                           |         |
| Symptom duration                   | -0.16                         |                           | 0.08    | -0.05                     |                           | 0.60    |
| MMSE score                         | -0.04                         |                           | 0.69    | 0.11                      |                           | 0.23    |
| General socio-emotional behaviours | Present                       | Absent                    |         | Present                   | Absent                    |         |
| Disinhibition                      | -0.203<br>(-0.359 - (-)0.063) | 0.080<br>(-0.058 - 0.202) | < 0.001 | 0.003<br>(-0.043 - 0.067) | 0.004<br>(-0.003 - 0.004) | < 0.001 |
| Apathy                             | -0.074<br>(-0.267 - 0.088)    | 0.077<br>(-0.063 - 0.202) | < 0.001 | 0.001<br>(-0.044 - 0.020) | 0.004<br>(0.001 - 0.004)  | < 0.001 |
| Obsessionality                     | -0.203<br>(-0.343 - (-)0.063) | 0.080<br>(-0.053 - 0.202) | < 0.001 | 0.001<br>(-0.085 - 0.072) | 0.004<br>(0.001 - 0.004)  | < 0.001 |
| Loss of empathy                    | -0.095<br>(-0.320 - 0.066)    | 0.080<br>(-0.063 - 0.202) | < 0.001 | 0.004<br>(-0.023 - 0.037) | 0.001<br>(-0.003 - 0.004) | < 0.001 |
| Inappropriate humour               | -0.095<br>(-0.320 - 0.080)    | 0.080<br>(-0.063 - 0.202) | < 0.001 | 0.004<br>(-0.037 - 0.023) | 0.001<br>(-0.003 - 0.004) | < 0.001 |

The table summarises the association of principal factors 1 and 2 with MMSE score and general socio-emotional behaviours across the combined patient cohort. Spearman's rho correlation coefficients and associated p values are shown for MMSE score; median (interquartile range) values are shown for patient subgroups reporting presence vs absence of each socio-emotional behaviour, together with p values of each subgroup comparison (assessed using Mann-Whitney U tests). MMSE, Mini-Mental State Examination score.

**Supplementary Table 6. Demographic, clinical and neuropsychological characteristics of patients in each reward behavioural cluster**

| Characteristic                       | Reward-seeking                           | Reward-restricted                | Eating-predominant                | Control-like                     |
|--------------------------------------|------------------------------------------|----------------------------------|-----------------------------------|----------------------------------|
|                                      | n = 12                                   | n = 12                           | n = 41                            | n = 54                           |
| <b>General</b>                       |                                          |                                  |                                   |                                  |
| No. (m:f)                            | 7:5                                      | 8:4                              | 29:12                             | 31:23                            |
| Handed (R:L)                         | 12:0                                     | 11:1                             | 37:4                              | 51:3                             |
| Age (y)                              | 70.7 (8.1)                               | 70.9 (8.1)                       | 66.3 (7.1)                        | 66.6 (7.7)                       |
| Education (y)                        | 13.0 (10.8-16.0)                         | 13.0 (12.0-16.5)                 | 16.0 (12.0-16.0)                  | 15.5 (12.0-16.0)                 |
| Illness (y)                          | 5.6 (5.0-7.4)                            | 5.7 (4.1-7.6)                    | 5.0 (4.2-6.4)                     | 4.7 (3.5-5.7)                    |
| <b>Syndromic diagnosis</b>           |                                          |                                  |                                   |                                  |
| AD                                   | 0 (0)                                    | 2 (17)                           | 9 (22)                            | 23 (43)                          |
| lvPPA                                | 0 (0)                                    | 2 (17)                           | 1 (24)                            | 9 (17)                           |
| bvFTD                                | 3 (25)                                   | 5 (42)                           | 16 (39)                           | 3 (6)                            |
| svPPA                                | 7 (58)                                   | 2 (17)                           | 8 (20)                            | 5 (9)                            |
| nfvPPA                               | 2 (17)                                   | 1 (8)                            | 7 (17)                            | 14 (26)                          |
| <b>Neuropsychological assessment</b> |                                          |                                  |                                   |                                  |
| <i>General</i>                       |                                          |                                  |                                   |                                  |
| MMSE (/30)                           | 22.0 (20.2-26.0)                         | 21.5 (15.0-26.5)                 | 22.0 (16.0-28.0)                  | 22.5 (14.2-27.0)                 |
| WASI VIQ                             | 66.0 (55.0-74.0) <sup>a</sup>            | 88.0 (65.5-111.0) <sup>a</sup>   | 75.0 (55.0-105.0) <sup>d</sup>    | 83.5 (66.2-98.0) <sup>d</sup>    |
| WASI PIQ                             | 97.0 (91.5-108.0) <sup>a</sup>           | 94.0 (73.0-107.5) <sup>a</sup>   | 84.0 (73.0-110.0) <sup>d</sup>    | 89.5 (77.5-105.0) <sup>d</sup>   |
| <i>Episodic memory</i>               |                                          |                                  |                                   |                                  |
| RMT Faces (/50)                      | 28.0 (25.5-31.5) <sup>a</sup>            | 30.0 (25.0-33.0) <sup>c</sup>    | 30.0 (25.0-37.0) <sup>d</sup>     | 32.0 (27.0-36.2) <sup>j</sup>    |
| RMT Words (/50)                      | 30.0 (25.5-36.5) <sup>b</sup>            | 33.0 (25.0-44.0) <sup>c</sup>    | 33.0 (25.0-42.0) <sup>h</sup>     | 36.5 (27.8-44.0) <sup>j</sup>    |
| <i>Executive functions</i>           |                                          |                                  |                                   |                                  |
| DS forward (max 12)                  | 6.0 (6.0-6.8) <sup>b</sup>               | 5.0 (4.0-6.5) <sup>a</sup>       | 7.0 (5.0-7.5) <sup>b</sup>        | 5.0 (4.0-6.0) <sup>d</sup>       |
| DS reverse (max 12)                  | 5.0 (3.2-5.0) <sup>b</sup>               | 3.0 (3.0-4.5) <sup>a</sup>       | 4.0 (2.5-5.0) <sup>b</sup>        | 3.0 (2.0-4.0) <sup>e</sup>       |
| DKEFS Stroop: colour (90 sec)        | 45.5 (41.2-54.0) <sup>b</sup>            | 50.0 (39.5-76.0) <sup>a</sup>    | 59.0 (44.5-87.5) <sup>b</sup>     | 62.5 (49.0-85.0) <sup>l</sup>    |
| words (90 sec)                       | 30.5 (26.5-37.0) <sup>b</sup>            | 33.0 (26.5-71.0) <sup>a</sup>    | 36.0 (26.2-56.8) <sup>c</sup>     | 36.0 (29.0-55.0) <sup>k</sup>    |
| interference (180 sec)               | 82.5 (59.0-96.8) <sup>b</sup>            | 145.0 (63.5-180.0) <sup>b</sup>  | 131.0 (77.5-180.0) <sup>b</sup>   | 180.0 (106.5-180.0) <sup>k</sup> |
| TMT-A                                | 57.0 (42.5-73.5) <sup>a</sup>            | 53.0 (40.5-137.0) <sup>a</sup>   | 61.5 (41.8-144.5) <sup>e</sup>    | 65.0 (49.2-122.2) <sup>h</sup>   |
| TMT-B                                | 177.0 (97.5-300.0) <sup>a</sup>          | 180.0 (95.0-300.0) <sup>a</sup>  | 291.0 (108.8-300.0) <sup>e</sup>  | 290.0 (143.0-300.0) <sup>i</sup> |
| Letter fluency (F)                   | 6.0 (3.2-8.5) <sup>b</sup>               | 9.0 (2.8-12.0) <sup>b</sup>      | 6.0 (1.0-12.5) <sup>b</sup>       | 6.0 (2.8-10.0) <sup>j</sup>      |
| Category fluency (animals)           | 5.0 (2.2-8.2) <sup>b</sup>               | 8.0 (4.2-15.2) <sup>b</sup>      | 6.0 (2.0-12.0) <sup>b</sup>       | 9.0 (3.0-13.0) <sup>i</sup>      |
| <i>Language</i>                      |                                          |                                  |                                   |                                  |
| BPVS (/150)                          | <b>66.0 (38.5-106.0)<sup>2,3,a</sup></b> | 144.0 (121.5-148.0) <sup>a</sup> | 135.5 (84.0-144.5) <sup>1,c</sup> | 140.0 (120.2-146.0) <sup>d</sup> |
| GNT (/30)                            | <b>0 (0-1.5)<sup>2,3,a</sup></b>         | 18.0 (4.0-24.0) <sup>a</sup>     | 10.0 (2.0-20.0) <sup>1,d</sup>    | 8.0 (2.0-19.0) <sup>e</sup>      |
| <i>Other skills</i>                  |                                          |                                  |                                   |                                  |
| GDA (/24)                            | 5.5 (3.3-13.2) <sup>b</sup>              | 4.0 (0.5-7.5) <sup>a</sup>       | 4.0 (1.0-15.0) <sup>d</sup>       | 3.0 (0-8.0) <sup>f</sup>         |
| VOSP (/20)                           | 15.0 (13.5-15.5) <sup>a</sup>            | 16.0 (14.0-18.0) <sup>a</sup>    | 16.0 (13.0-18.0) <sup>c</sup>     | 16.0 (14.0-18.0) <sup>h</sup>    |
| <b>General behavioural change</b>    |                                          |                                  |                                   |                                  |
| Disinhibition                        | <b>11 (92)</b>                           | <b>8 (67)</b>                    | <b>27 (66)</b>                    | 10 (19)                          |
| Apathy                               | 7 (58)                                   | 9 (75)                           | 31 (76)                           | 26 (48)                          |
| Obsessionality                       | <b>10 (83)</b>                           | <b>11 (92)</b>                   | <b>27 (66)</b>                    | 6 (11)                           |
| Loss of empathy                      | <b>10 (83)</b>                           | 8 (67)                           | <b>27 (66)</b>                    | 18 (33)                          |
| Inappropriate humour                 | <b>11 (92)</b>                           | 7 (58)                           | 24 (59)                           | 23 (43)                          |

Counts (standard deviation) are shown for general demographic and clinical data; counts (percentage of group) are shown for diagnostic syndromes and behavioural change data; and mean (standard deviation) or median (interquartile range) scores are shown for neuropsychological tests (with maximum scores in parentheses). Differences between reward behavioural clusters were assessed using ANOVA, Kruskal-Wallis test and chi-square test with post-hoc correction. Significant differences ( $p_{FDR} < 0.05$ ) compared with the ‘control-like’ cluster are in bold; significant differences compared with other reward clusters are coded as follows: <sup>1</sup>significantly different from ‘reward-seeking’ cluster, <sup>2</sup>significantly different from ‘reward-restricted’ cluster, <sup>3</sup>significantly different from ‘eating-predominant’ cluster (all  $p_{FDR} < 0.05$ ). AD, patient group with typical Alzheimer’s disease; BPVS, British Picture Vocabulary Scale (Dunn, Dunn and Whetton, 1982); bvFTD, patient group with behavioural variant frontotemporal dementia; Controls, healthy control group; D-KEFS, Delis Kaplan Executive System (Delis et al., 2001); DS, Digit Span; f, female; GDA, Graded Difficulty Arithmetic test (Jackson and Warrington, 1986); GNT, Graded Naming Test (McKenna and Warrington, 1983); Handed, handedness; Illness, estimated symptom duration; L, left; lvPPA, patient group with logopenic variant primary progressive aphasia; m, male; MMSE, Mini-Mental State Examination score (Folstein, Folstein and McHugh, 1975); nfvPPA, patient group with nonfluent/agrammatic variant primary progressive aphasia; no., number; PIQ, performance IQ; R, right; RMT, Recognition Memory Test (Warrington, 1984); svPPA, patient group with semantic variant primary progressive aphasia; TMT, trail making test; VIQ, verbal IQ; VOSP, Visual Object and Space Perception Battery – Object Decision test (Warrington, McKenna and Orpwood, 1998); WASI, Wechsler Abbreviated Scale of Intelligence (Wechsler, 1997); y, years. A reduced number of participants completed certain tests, as follows: <sup>a</sup>n-1, <sup>b</sup>n-2, <sup>c</sup>n-3, <sup>d</sup>n-4, <sup>e</sup>n-5, <sup>f</sup>n-6, <sup>g</sup>n-7, <sup>h</sup>n-8, <sup>i</sup>n-9, <sup>j</sup>n-10, <sup>k</sup>n-11, <sup>l</sup>n-12.

**Supplementary Table 7. Prevalence of reward behavioural changes in all reward behavioural clusters**

| Reward domain      | Change             | Reward-seeking |                          | Reward-restricted |                          | Eating-predominant |                          | Control-like |    |
|--------------------|--------------------|----------------|--------------------------|-------------------|--------------------------|--------------------|--------------------------|--------------|----|
|                    |                    | n              | %                        | n                 | %                        | n                  | %                        | n            | %  |
| <i>Primary</i>     | Any                | <b>12</b>      | <b>100</b>               | <b>9</b>          | <b>75</b>                | <b>39</b>          | <b>95</b>                | 18           | 33 |
|                    | <i>Inc</i>         | <b>12</b>      | <b>100</b>               | <b>8</b>          | <b>67</b>                | <b>32</b>          | <b>78</b>                | 12           | 22 |
|                    | <i>Dec</i>         | 4              | 33                       | 9                 | 75                       | 17                 | 41                       | 6            | 11 |
| Appetite           | Any                | <b>9</b>       | <b>75</b>                | <b>8</b>          | <b>67</b>                | <b>34</b>          | <b>83</b>                | 8            | 15 |
|                    | <i>Inc</i>         | <b>5</b>       | <b>42</b>                | <b>5</b>          | <b>42</b>                | <b>23</b>          | <b>56</b>                | 2            | 4  |
|                    | <i>Dec</i>         | 4              | 33                       | 3                 | 25                       | 11                 | 27                       | 6            | 11 |
| Sweet tooth        | Any ( <i>Inc</i> ) | <b>8</b>       | <b>67</b>                | <b>7</b>          | <b>58</b>                | <b>30</b>          | <b>73</b>                | 10           | 19 |
| Sexual behaviour   | Any                | <b>7</b>       | <b>58</b> <sup>2,3</sup> | <b>8</b>          | <b>67</b>                | <b>12</b>          | <b>29</b>                | 0            | 0  |
|                    | <i>Inc</i>         | <b>7</b>       | <b>58</b> <sup>2,3</sup> | 0                 | 0 <sup>1</sup>           | 1                  | 2 <sup>1</sup>           | 0            | 0  |
|                    | <i>Dec</i>         | 0              | 0 <sup>2</sup>           | 8                 | 67 <sup>1,3</sup>        | 11                 | 27 <sup>2</sup>          | 0            | 0  |
| <i>Non-primary</i> | Any                | <b>12</b>      | <b>100</b> <sup>3</sup>  | <b>12</b>         | <b>100</b> <sup>3</sup>  | <b>26</b>          | <b>63</b> <sup>1,2</sup> | 8            | 15 |
|                    | <i>Inc</i>         | <b>12</b>      | <b>100</b> <sup>3</sup>  | <b>11</b>         | <b>92</b> <sup>3</sup>   | <b>19</b>          | <b>46</b> <sup>1,2</sup> | 7            | 13 |
|                    | <i>Dec</i>         | 3              | 25 <sup>2</sup>          | 10                | 83 <sup>1,3</sup>        | 8                  | 20 <sup>2</sup>          | 1            | 2  |
| Religion           | Any ( <i>Inc</i> ) | <b>8</b>       | <b>67</b> <sup>2,3</sup> | 1                 | 8 <sup>1</sup>           | 0                  | 0 <sup>1</sup>           | 3            | 6  |
| Music              | Any                | <b>11</b>      | <b>92</b> <sup>3</sup>   | <b>8</b>          | <b>67</b>                | <b>17</b>          | <b>41</b> <sup>1</sup>   | 3            | 6  |
|                    | <i>Inc</i>         | <b>11</b>      | <b>92</b> <sup>2,3</sup> | 0                 | 0 <sup>1,3</sup>         | 14                 | 34 <sup>1,2</sup>        | 2            | 4  |
|                    | <i>Dec</i>         | 0              | 0 <sup>2</sup>           | 8                 | 67 <sup>1,3</sup>        | 3                  | 7 <sup>2</sup>           | 1            | 2  |
| Art                | Any                | <b>4</b>       | <b>33</b>                | <b>7</b>          | <b>58</b> <sup>3</sup>   | <b>8</b>           | <b>20</b> <sup>2</sup>   | 1            | 2  |
|                    | <i>Inc</i>         | 1              | 8                        | 2                 | 17                       | 3                  | 7                        | 1            | 2  |
|                    | <i>Dec</i>         | 3              | 25                       | 5                 | 42                       | 5                  | 12                       | 0            | 0  |
| Colours            | Any ( <i>Inc</i> ) | 2              | 17 <sup>2</sup>          | <b>11</b>         | <b>92</b> <sup>1,3</sup> | 4                  | 10 <sup>2</sup>          | 1            | 2  |

This table summarises the prevalence of altered reward behaviours in each hedonic domain for each reward cluster, as determined from the symptom survey (see text and Supplementary Table 2); raw counts and percentage of group are indicated. Significant differences (chi-square test with post-hoc  $p_{FDR} < 0.05$ ) compared with the ‘control-like’ cluster are in bold; significant differences compared with other reward clusters are coded as follows: <sup>1</sup>significantly different from ‘reward-seeking’ cluster, <sup>2</sup>significantly different from ‘reward-restricted’ cluster, <sup>3</sup>significantly different from ‘eating-predominant’ cluster. Change, overall frequency and dominant direction of behavioural alteration (see main text, Supplementary Tables 2 and 3).

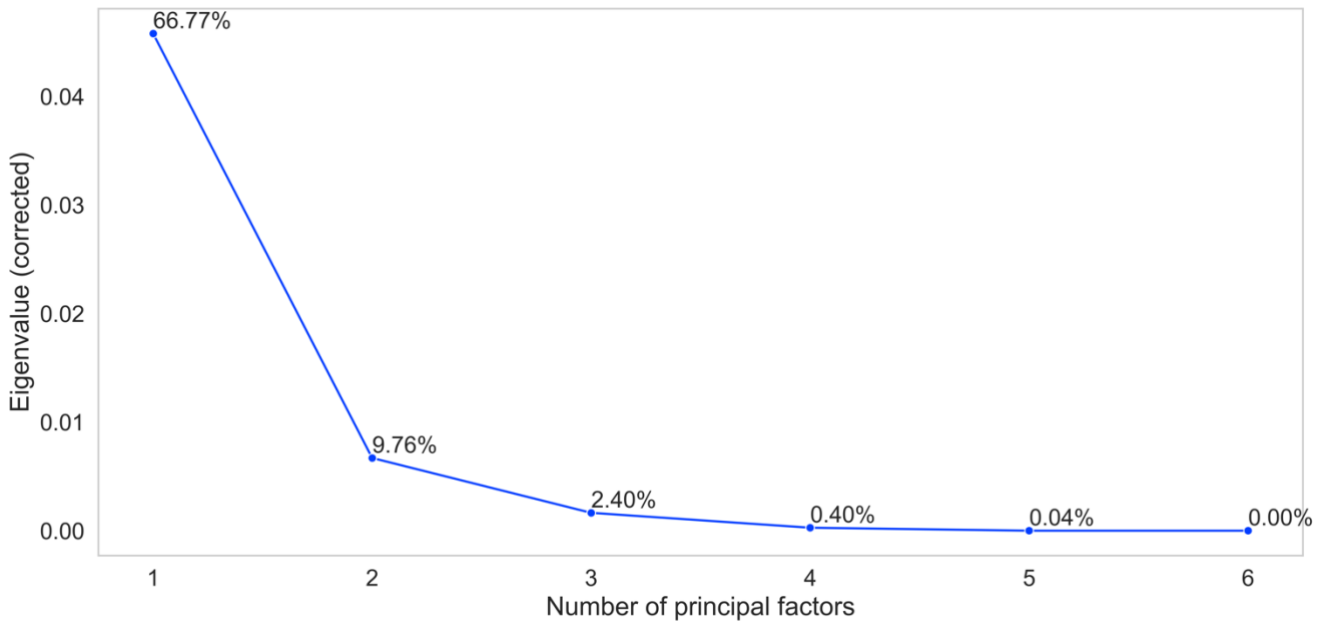

**Supplementary Figure 1.** A scree plot showing the eigenvalue (y-axis) of each principal factor from the multiple correspondence analysis of all reward features, after applying the Greenacre correction method. The proportion of explained variance (%) is shown for each principal factor. The ‘elbow’ in the plot trajectory indicates that most variance is accounted for by the first two principal factors.

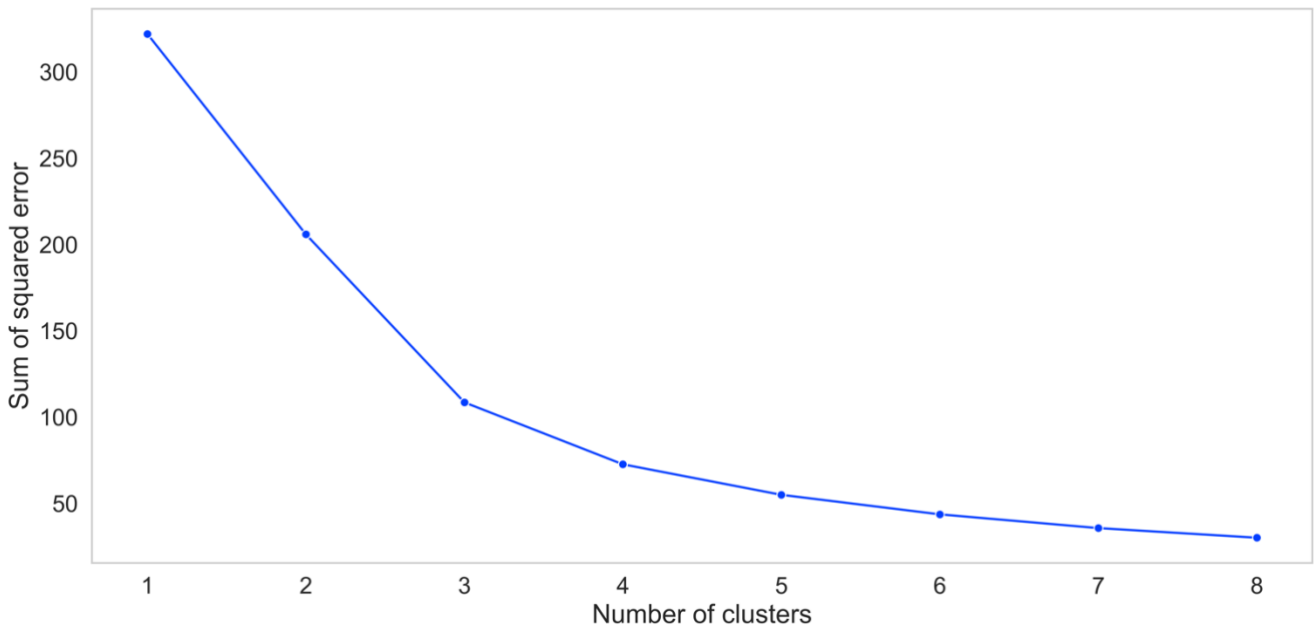

**Supplementary Figure 2.** A scree plot showing the value of the sum of squared errors at each number of clusters, derived from a k-means clustering algorithm on the first and second principal factors representing reward features. The ‘elbow’ in the plot trajectory indicates that most variability is accounted for by cluster  $n = 4$ .

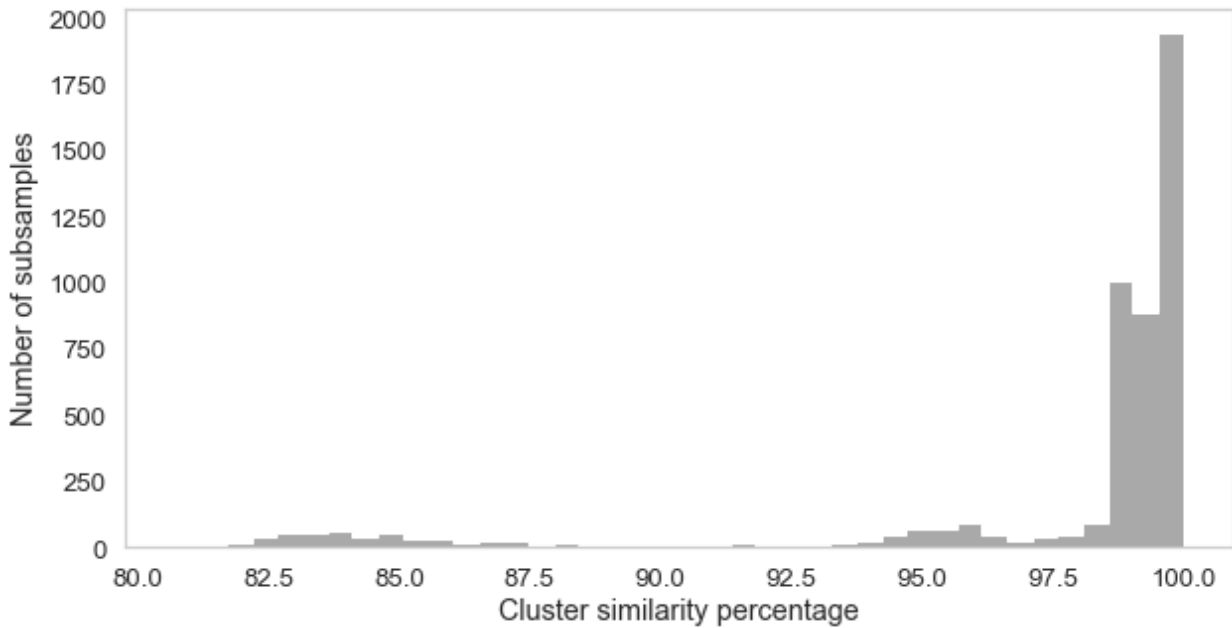

**Supplementary Figure 3.** A histogram showing the output of the cluster stability analysis. The x-axis shows the average percentage similarity between clusters in each subsample and the original clusters; the y-axis displays the count of the subsamples. The cluster stability analysis was performed by iteratively sampling 80% of the original data and applying the k-means clustering algorithm on the resampled dataset with replacement after each of 5000 iterations. From the graph, most iterations resulted in an average cluster similarity percentage >95%. The cluster stability index (average subsampled cluster similarity) over all 5000 iterations was 97.5%.

## References

1. Ben-Hur A, Elisseeff A, Guyon I. A stability based method for discovering structure in clustered data. *Pac Symp Biocomput.* 2002:6-17.
